# Supplementary material
Source: HighWire-hosted journal article supplement (https://gut.bmj.com/content/gutjnl-2020-320652)
Supplement: inline-supplementary-material-4 [file inline-supplementary-material-4.xlsx]

## Sheet: RALY miRIP-seq
Table 3. RALY Overexpression in 293T cells (RIP-seq ,log2 FC<-3)
miRNA	RALY-count	IgG-count	log2 FC
MIR20B	2520	12	-9.01755
MIR93	75573	812	-7.86452
MIR15A	371	4	-7.7971
MIR106A	4547	59	-7.5883
MIR25	149295	2049	-7.51156
MIR378C	1710	25	-7.4103
MIR18B	271	4	-7.34407
MIR92A2	2659720	43128	-7.27108
MIR3144	159	3	-6.96969
MIR30B	14909	308	-6.92086
MIR598	492	10	-6.91983
MIR19B2	9632	204	-6.88453
MIR107	5227	116	-6.81617
MIR194-2	1349	31	-6.75985
MIR101-2	15752	372	-6.72799
MIR101-1	15564	371	-6.71455
MIR221	228670	5485	-6.70617
MIR15B	4348	111	-6.61401
MIR197	2703	71	-6.5716
MIR10A	778242	20673	-6.55897
MIR194-1	1000	27	-6.52607
MIR16-1	6272	173	-6.50319
MIR152	1338	37	-6.49412
MIR10B	217138	6042	-6.49198
MIR660	2153	60	-6.48558
MIR195	149	4	-6.4814
MIR652	871	25	-6.4371
MIR542	546	16	-6.40151
MIR32	1659	49	-6.40078
MIR3613	772	24	-6.32151
MIR92B	37889	1200	-6.30505
MIR148B	38900	1246	-6.28877
MIR31	1302	42	-6.27274
MIR4677	190	6	-6.26769
MIR28	1288	43	-6.22333
MIR708	839	28	-6.2207
MIR210	760	26	-6.18426
MIR106B	20788	721	-6.17384
MIR125B1	1431	52	-6.10208
MIR125B2	1564	57	-6.09827
MIR500A	1038	38	-6.08958
MIR378D2	140	5	-6.08202
MIR450A1	1565	58	-6.07418
MIR185	4868	181	-6.07245
MIR502	864	32	-6.07156
MIR590	806	30	-6.06389
MIR181C	245	9	-6.06336
MIR450A2	1551	58	-6.06122
MIR324	610	23	-6.04269
MIR362	536	21	-5.98633
MIR26B	16000	636	-5.97709
MIR339	1658	66	-5.97158
MIR378A	34764	1408	-5.95028
MIR99A	20399	855	-5.90072
MIR132	1406	59	-5.89503
MIR454	2005	86	-5.86476
MIR378D1	120	5	-5.85975
MIR215	165	7	-5.84781
MIR30E	25251	1108	-5.83467
MIR345	1021	45	-5.82288
MIR548O	401	18	-5.78813
MIR589	860	39	-5.7809
MIR191	27159	1248	-5.76812
MIR30A	28075	1292	-5.766
MIR140	3740	173	-5.75732
MIR16-2	7961	375	-5.7319
MIR30D	92602	4368	-5.73053
MIR769	2291	109	-5.71584
MIR30C2	35309	1692	-5.70767
MIR30C1	35225	1691	-5.70509
MIR9-3	7059	340	-5.6997
MIR374A	3302	161	-5.68122
MIR548B	106	5	-5.6809
MIR196A2	5908	289	-5.67724
MIR218-2	32644	1598	-5.67691
MIR9-1	7060	347	-5.67052
MIR1271	1018	50	-5.66721
MIR218-1	33012	1638	-5.65741
MIR33A	101	5	-5.61123
MIR375	548	28	-5.60627
MIR4326	370	19	-5.59481
MIR503	1983	103	-5.5891
MIR196A1	5413	282	-5.58635
MIR1296	615	32	-5.58116
MIR186	22643	1211	-5.54917
MIR181B1	1782	97	-5.52136
MIR301A	442	24	-5.51706
MIR4473	234	13	-5.47526
MIR766	180	10	-5.46953
MIR98	919	52	-5.46323
MIR24-2	1876	107	-5.45421
MIR148A	271053	15561	-5.44714
MIR1269B	542	31	-5.44444
MIR483	229	13	-5.44411
MIR26A2	89627	5194	-5.43355
MIR26A1	89617	5198	-5.43228
MIR340	11460	669	-5.42267
MIR618	259	15	-5.41782
MIR548K	559	33	-5.39929
MIR361	1480	88	-5.39368
MIR181B2	2085	125	-5.38262
MIR182	17673	1076	-5.36215
MIR3679	100	6	-5.34217
MIR450B	1743	108	-5.33473
MIR29B2	131	8	-5.32693
MIR320A	22890	1435	-5.32
MIR425	2251	141	-5.3196
MIR222	189103	11880	-5.31713
MIR7976	146	9	-5.31683
MIR212	161	10	-5.30866
MIR96	1405	89	-5.30239
MIR29B1	128	8	-5.29352
MIR149	830	53	-5.2889
MIR501	1366	88	-5.27804
MIR421	1221	79	-5.27148
MIR1304	1529	99	-5.27107
MIR27B	20162	1309	-5.26949
MIR330	693	45	-5.26387
MIR181D	1422	93	-5.25644
MIR181A1	1510	100	-5.23855
MIR577	289	19	-5.23844
MIR942	638	43	-5.20991
MIR320B2	1773	120	-5.20758
MIR21	19278	1392	-5.11613
MIR628	113	8	-5.11381
MIR1910	112	8	-5.10099
MIR181A2	1545	113	-5.09558
MIR126	1954	144	-5.08514
MIR3177	254	19	-5.05224
MIR625	1205	91	-5.04886
MIR320B1	2155	164	-5.03898
MIR95	356	27	-5.0362
MIR128-2	31095	2410	-5.01406
MIR505	2334	181	-5.01195
MIR193B	247	19	-5.01194
MIR1292	129	10	-4.98913
MIR532	9673	763	-4.98847
MIR128-1	34742	2748	-4.98472
MIR183	18662	1489	-4.97211
MIR130B	5840	468	-4.96544
MIR1278	121	10	-4.89682
MIR1250	179	15	-4.885
MIR455	938	80	-4.87299
MIR676	163	14	-4.84829
MIR500B	173	15	-4.83583
MIR192	4228	374	-4.82279
MIR342	609	54	-4.8154
MIR23B	997	89	-4.80751
MIR146B	2265	204	-4.79624
MIR365A	101	9	-4.78553
MIR641	451	41	-4.77797
MIR629	3755	345	-4.76801
MIR424	2060	193	-4.73927
MIR200C	224	21	-4.72786
MIR1180	4826	459	-4.71831
MIRLET7D	1938	186	-4.70445
MIR146A	135	13	-4.68203
MIR346	185	18	-4.67235
MIR760	626	66	-4.56647
MIR4467	266	28	-4.56372
MIR23A	572	61	-4.54968
MIR296	906	97	-4.5455
MIR449C	140	15	-4.53063
MIR331	189	21	-4.48283
MIR744	4427	520	-4.41386
MIR3173	205	24	-4.4089
MIR187	201	25	-4.32202
MIR29A	1063	138	-4.26822
MIR328	635	85	-4.22294
MIR1301	970	130	-4.22218
MIR3909	240	33	-4.17972
MIR615	4147	599	-4.11562
MIR7-3	53467	7929	-4.07799
MIR7-1	54537	8135	-4.06958
MIR1-1	126	20	-3.96792
MIR129-2	158	26	-3.9187
MIR129-1	149	26	-3.83412
MIR877	326	63	-3.69226
MIR199B	215	49	-3.4533
MIR320C1	279	64	-3.44505
MIR100	297	70	-3.40629
MIR320C2	270	67	-3.33185
MIR199A1	185	50	-3.20752
MIR27A	1671	460	-3.18509

## Sheet:  RALY KD miRNA-seq
Table 3. RALY Knockdown in HCT116 cells (miRNA-seq, |log2 FC|＞1)
miRNA	CTRL-count	RALY KD-count	log2 FC
MIR605	27	3	3.16993
MIR326	20	3	2.73697
MIR1914	12	2	2.58496
MIR4527	23	4	2.52356
MIR3136	30	6	2.32193
MIR1257	22	5	2.1375
MIR19B2	11	3	1.87447
MIR618	163	47	1.79414
MIR30A	2293	699	1.71387
MIR483	62	20	1.63227
MIR5094	37	12	1.62449
MIR224	251	83	1.5965
MIR3659	21	7	1.58496
MIR4425	20	7	1.51457
MIR96	65	23	1.49881
MIR551A	404	147	1.45854
MIR5696	19	7	1.44057
MIR212	16	6	1.41504
MIR4762	16	6	1.41504
MIR877	267	101	1.40248
MIR148A	54711	21066	1.37691
MIR4504	65	26	1.32193
MIR3170	44	18	1.28951
MIR188	58	24	1.27302
MIR4664	24	10	1.26303
MIR3200	127	53	1.26076
MIR301A	367	155	1.24351
MIR2113	98	42	1.22239
MIR301B	284	123	1.20723
MIR4676	23	10	1.20163
MIR1224	48	21	1.19265
MIR548AB	40	18	1.152
MIR4326	104	47	1.14585
MIR676	44	20	1.1375
MIR2355	131	60	1.12653
MIR3684	28	13	1.10692
MIR345	1379	647	1.09178
MIR7974	1291	611	1.07924
MIR3115	21	10	1.07039
MIR26A1	23	11	1.06413
MIR3157	69	33	1.06413
MIR7851	23	11	1.06413
MIR330	628	301	1.061
MIR33A	397	191	1.05557
MIR654	29	14	1.05063
MIR1343	35	17	1.04182
MIR139	286	139	1.04093
MIR3691	74	36	1.03953
MIR615	867	422	1.03879
MIR324	129	64	1.01123
MIR142	40	80	-1
MIR3607	13	26	-1
MIR34C	58	132	-1.18641
MIR205	71	267	-1.91095
MIR3148	4	29	-2.85798

## Sheet: RALY KD mRNA-seq
Table 3. RALY Knockdown in HCT116 cells (mRNA-seq, log2 FC＞1)
Gene symbol	CTRL-value	RALY KD-value	log2 FC
PORCN	0.305349	5.02782	4.0414
MT1X	6.67117	86.1038	3.69006
MT2A	2.87707	34.4962	3.58376
ETFB	0.84429	9.64934	3.51462
GUK1	0.797651	8.97818	3.49259
YDJC	1.18987	13.2246	3.47435
NR1H2	0.300379	3.10588	3.37015
MT1E	14.0846	141.63	3.32994
APOE	0.346374	3.48111	3.32914
DGCR6L	0.580961	5.32465	3.19617
RNPEPL1	0.333095	3.01003	3.17577
THAP3	0.476922	4.18627	3.13384
ZNF358	0.890336	7.62026	3.09742
TOM1	0.358186	3.03791	3.0843
MIIP	0.344924	2.91733	3.0803
DNPH1	1.30075	10.7374	3.04523
SNCG	0.701432	5.75791	3.03717
CPA4	2.75183	21.9151	2.99346
TMEM91	0.566382	4.49099	2.98718
PKP3	0.340176	2.67887	2.97727
FAM89B	1.08299	8.31132	2.94006
FAM195B	0.435976	3.31666	2.92741
NDUFS8	3.41375	25.8497	2.92072
ATP5I	18.2429	136.529	2.9038
ARMC6	1.54628	11.5706	2.9036
IFI35	0.805747	5.76926	2.83999
CDKL4	0.456051	3.25601	2.83584
PPCDC	1.0578	7.51598	2.82889
SFN	3.31322	23.4571	2.82372
DOK1	1.12374	7.80413	2.79593
IGFBP2	3.06572	20.4257	2.73609
CRIP1	4.84336	32.217	2.73374
PACSIN3	0.649565	4.1423	2.67289
LAMTOR4	3.65666	23.2568	2.66905
NAA38	1.49243	9.44226	2.66147
C12orf57	6.52657	41.2655	2.66054
ZNF593	2.96068	18.6595	2.65591
HAGH	1.50511	9.39068	2.64136
ACTL8	0.849812	5.23328	2.6225
CD320	1.82237	11.0012	2.59377
SSNA1	1.06156	6.38418	2.58832
PHLDA2	2.08111	12.4449	2.58013
RTN1	0.884203	5.27125	2.57569
ACD	0.778515	4.60433	2.56419
PVRL4	2.43583	14.348	2.55836
AK1	2.92312	17.1725	2.55452
SH3GLB2	1.44009	8.41688	2.54712
NCLN	0.703471	4.07909	2.53568
TERC	8.48319	48.9945	2.52994
TMEM42	7.36486	41.9433	2.50971
CAMKK1	0.482488	2.69521	2.48183
TMEM208	7.82881	43.7159	2.48129
RN7SL1	53558.6	297681	2.47458
KRT19	33.3004	182.524	2.45448
SDF4	1.73416	9.50362	2.45424
KCTD13	0.473351	2.57661	2.44449
ROMO1	6.85932	37.1729	2.43811
CYHR1	0.639246	3.43465	2.42572
SCO2,TYMP	1.93075	10.3607	2.4239
NDUFA13	14.4523	77.4749	2.42243
CCNT2-AS1	0.657034	3.49358	2.41066
CTU2	1.95502	10.3886	2.40975
SCARNA2	6.66817	35.3321	2.40562
CCDC28B	0.566101	2.9984	2.40506
LSM10	14.7006	77.4766	2.39789
LYPLA2	3.49598	18.3533	2.39227
BMP1	1.03959	5.44986	2.3902
GADD45B	1.03149	5.38931	2.38537
AKR1B10	2.22724	11.5797	2.37827
RFNG	0.94992	4.93424	2.37695
EDF1	6.52703	33.8416	2.3743
C16orf13	2.74056	14.1887	2.37219
EGLN2,MIA,RAB4B	1.35454	7.00525	2.37063
GJB5	1.17741	6.07704	2.36775
KRTAP2-3	27.3002	139.006	2.34816
CD151	6.47798	32.9763	2.34781
CTSD	2.37815	12.0106	2.3364
FADS3	1.40452	7.07982	2.33363
HIST1H2AK	17.1733	86.3087	2.32933
C20orf27	3.13138	15.6885	2.32484
CORO7,CORO7-PAM16,PAM16	6.79231	33.9804	2.32273
AURKAIP1	2.20736	11.0323	2.32134
ZNF511	2.82729	14.1221	2.32046
LAGE3	2.17672	10.8693	2.32003
GRK6	2.99509	14.7931	2.30426
RABAC1	4.98247	24.5862	2.30292
IDH3G	4.12802	20.2614	2.29521
LOC100505912	0.712613	3.49173	2.29275
LOH12CR2	0.862529	4.20009	2.28378
NUDT16L1	2.02363	9.84409	2.28231
WDR74	17.0043	82.1275	2.27197
RN7SL2	27394.8	132155	2.27026
ANAPC2	1.11694	5.37205	2.26592
HIST1H2BN	27.4155	131.83	2.26562
HIATL2	7.48804	35.6752	2.25226
CCDC137	2.38935	11.3236	2.24464
TCEB2	6.51899	30.5305	2.22753
VPS28	3.29202	15.3623	2.22235
CST3	32.6531	152.372	2.2223
FIS1	30.1011	140.382	2.22147
MIR762HG	4.28081	19.8351	2.2121
TRIM11	0.853891	3.9382	2.20541
MRPL4	2.2518	10.3086	2.1947
CLTB	1.51007	6.88748	2.18937
SNX29P1	1.03336	4.70756	2.18764
CCDC142,MRPL53	3.00793	13.6476	2.1818
PKN1	3.96282	17.946	2.17907
LINC00938	2.77436	12.5578	2.17836
GPR87	3.16023	14.2889	2.1768
UBE2S	11.7505	53.1199	2.17654
HRAS	5.0577	22.75	2.16932
STUB1	1.71267	7.70231	2.16904
C20orf196	1.73636	7.79784	2.16701
JMJD8	3.2882	14.7212	2.16252
KCNQ2	1.75175	7.83928	2.16193
RPS19	179.421	797.012	2.15126
RRAS	2.22758	9.83758	2.14283
SLC12A9	0.790375	3.48409	2.14017
PLD3	2.42816	10.6944	2.13892
TIMM10	17.5161	76.5496	2.12772
PLEKHJ1	3.27525	14.2777	2.12409
HOMER3	2.4003	10.4467	2.12175
KLRG1	0.627179	2.72442	2.119
ARHGEF1	0.578742	2.50207	2.11213
HIST1H4B	913.765	3944.19	2.10983
RHOD	4.64992	20.0632	2.10928
TRAF3IP2-AS1	6.09738	26.2753	2.10745
BRMS1	3.46818	14.8307	2.09633
TRPM3	0.759728	3.23804	2.09156
PPP1R14B	13.463	57.2701	2.08879
MORN4	2.33729	9.90704	2.08362
RPPH1	1488.03	6264.91	2.07389
TBL3	0.852909	3.58966	2.07339
KLK8	3.50587	14.7549	2.07335
BIK	4.74779	19.9676	2.07233
DEAF1	1.16614	4.88067	2.06534
HIRIP3	1.048	4.37015	2.06005
COX14	25.0333	104.374	2.05984
FBXL6,TMEM249	0.71094	2.94325	2.04961
MYEOV2	22.995	94.9443	2.04576
EIF6	121.753	502.503	2.04518
LAMTOR2	6.99153	28.8308	2.04393
RPS10P7	1.3236	5.45696	2.04363
C17orf89	16.8113	69.2011	2.04137
PKN3	0.833584	3.4214	2.03719
RBCK1	1.32104	5.40752	2.03329
IFRD2	3.12123	12.7757	2.03322
CYC1	42.2756	172.113	2.02546
CDC42EP1	0.681847	2.775	2.02497
CAPG	8.83777	35.9015	2.02229
PNPLA6	1.49285	6.05146	2.01921
SNHG15,SNORA9	39.7149	160.976	2.0191
CHMP1A	7.3869	29.8642	2.01538
SLC9B1	0.631791	2.55278	2.01455
CLCN2	1.35487	5.47093	2.01364
THEM6	0.813449	3.28091	2.01197
AGAP3	1.72145	6.92716	2.00864
TMEM125	1.79105	7.20486	2.00816
DDX39A	10.129	40.7061	2.00675
PLA2G15	0.643595	2.58548	2.00621
EXOSC4	3.79487	15.233	2.00508
NECAB3	3.26806	13.0987	2.00292
DCXR	14.4485	57.3161	1.98802
HSD17B10	38.4976	152.335	1.98441
IL11RA	0.756099	2.99107	1.98401
UNC93B1	1.48727	5.87383	1.98163
SLC25A39	11.1786	44.1362	1.98123
FKBP2	2.35578	9.29639	1.98047
FDXR	1.58034	6.23494	1.98014
EIF4EBP1	4.01892	15.8471	1.97934
CDK20	1.29033	5.07325	1.97517
HIST1H3H	9.56264	37.5751	1.97429
DUSP9	1.74144	6.83797	1.97328
NDUFA7	4.92545	19.3126	1.97121
COX8A	28.5462	111.837	1.97002
COPE	3.2749	12.8239	1.96931
NDUFB2	68.7519	269.054	1.96843
MATR3	15664.2	61275.9	1.96784
NCK1-AS1	2.37515	9.28699	1.96719
MXD3	4.70229	18.3563	1.96484
RRP7A	2.93942	11.4655	1.96369
OXLD1	3.32128	12.937	1.9617
HOTAIRM1	4.56755	17.7386	1.9574
DDRGK1	1.76963	6.8515	1.95297
PXMP2	10.8091	41.7917	1.95098
ZFYVE27	1.09415	4.2285	1.95033
IRF3	3.10527	12.0007	1.95033
POLRMT	1.24926	4.82597	1.94975
LY6G5B	2.34189	9.02873	1.94685
DPCD	28.8666	111.191	1.94557
RN7SK	33510.1	128931	1.94393
BLVRB	4.22	16.2092	1.9415
PQBP1	16.3994	62.9855	1.94138
DEXI	4.34368	16.6665	1.93996
PHPT1	2.64013	10.129	1.93982
SEC14L1	980.534	3746.09	1.93374
LAMB2	1.49792	5.71195	1.93102
CUEDC2	14.7963	56.3218	1.92846
URB1-AS1	3.13495	11.9286	1.92791
SF3B5	31.627	119.455	1.91724
GMPPB	1.48662	5.60931	1.91578
ALDOA	155.781	587.159	1.91423
POLR2J	1.2623	4.75607	1.91372
RASSF1	2.40593	9.04476	1.91049
NOL3	1.36532	5.12593	1.90857
LY6E	8.73969	32.8	1.90804
ECE2	4.04999	15.1807	1.90625
MCRS1	9.61425	36.0153	1.90536
LOC101928053	0.764856	2.85808	1.90179
CDKN1A	97.7108	365.088	1.90165
COX5B	33.26	123.869	1.89695
TIMM17B	6.20796	23.107	1.89614
DDX49	3.28098	12.1928	1.89382
TBC1D2	0.750909	2.78239	1.88962
DMTN	5.16441	19.1253	1.88881
APRT	13.6025	50.3437	1.88794
NCAPH2	3.91075	14.4722	1.88776
FAM41C	1.60997	5.94243	1.88402
MRPL12	38.7167	142.857	1.88355
MKNK2	1.79363	6.58606	1.87654
SNORD17	4956.13	18194.6	1.87623
ARFGAP1	1.73147	6.35065	1.8749
TRADD	2.6426	9.67992	1.87304
MCOLN1	1.08722	3.97878	1.87168
HIST1H4A	98.821	360.978	1.86902
S100A16	34.3145	125.222	1.86759
ANKLE1	0.956711	3.48717	1.8659
COX4I1	176.722	644.016	1.86562
RRP9	5.42185	19.7528	1.8652
NMRAL1	7.15761	26.0529	1.8639
MOSPD3	1.38791	5.05156	1.86381
SLC2A8	0.674337	2.4518	1.8623
ITPA	12.5082	45.4319	1.86084
RILP	1.20321	4.36491	1.85906
SEPW1	55.2545	200.324	1.85817
SCARNA12	1305.18	4728.99	1.85728
TIMM50	16.8177	60.7735	1.85347
RPL35	537.832	1942.23	1.85248
NPM3	33.1363	119.633	1.85213
RPS5	327.128	1180.32	1.85124
SPATA20	2.033	7.32203	1.84864
DNTTIP1	13.535	48.6678	1.84627
HMOX2	17.6738	63.5201	1.8456
BAX	4.05394	14.5556	1.84418
FAM96B	19.4444	69.7353	1.84253
KRTCAP3	12.3118	44.1494	1.84235
PNKD	6.00184	21.515	1.84187
SCYL1	2.11166	7.56867	1.84166
FAAH2	1.94259	6.95973	1.84105
COMMD5	5.09161	18.2367	1.84065
FXYD3	1.65809	5.93801	1.84046
LZTR1	0.715635	2.55578	1.83646
HAUS7	1.21213	4.32697	1.83582
NTSR1	1.37044	4.89074	1.83541
RAB25	12.3559	43.9123	1.82942
STX10	4.51554	16.0218	1.82707
ASNA1	17.737	62.8162	1.82437
MTFP1	7.7336	27.3805	1.82394
FBXO44	1.08411	3.83217	1.82164
IRX4	0.773834	2.73516	1.82153
MECR	2.52691	8.9298	1.82125
CCDC167	12.7253	44.9542	1.82075
SIRT7	0.751848	2.65391	1.8196
TIMM8B	33.7319	119.035	1.8192
ZFAND2B	2.0807	7.34007	1.81872
MPST	2.15058	7.57849	1.81718
GPR108	8.10151	28.4467	1.812
CBLC	1.8408	6.44424	1.80768
AP5S1	1.27201	4.45263	1.80755
MRPS12	9.5835	33.5074	1.80585
C11orf68	4.84389	16.9298	1.80533
FAM229B	6.99032	24.4095	1.80401
C12orf73	3.36151	11.7319	1.80325
NT5C	2.71061	9.4556	1.80255
NDUFC1	27.9932	97.551	1.80108
DTYMK	4.71026	16.3427	1.79477
IFITM2	17.206	59.6803	1.79434
RMDN2	2.08508	7.21085	1.79007
ZNF668	0.74839	2.58806	1.79001
TCTEX1D2,TM4SF19	3.33731	11.5086	1.78595
RABGGTA	3.3795	11.6417	1.78442
RPP21,TRIM39,TRIM39-RPP21	3.97489	13.6567	1.78062
DPY19L1P1	5.7093	19.6102	1.78022
YIF1A	13.2543	45.5118	1.77978
GSTP1	78.7621	270.173	1.77831
SCARNA5	12394.3	42513.4	1.77825
MYL6	342.273	1173.88	1.77807
PPOX	5.22053	17.895	1.77729
AAMP	11.8973	40.7694	1.77685
TRMT1	3.90804	13.3649	1.77393
RPS9	90.9622	310.785	1.77258
RMRP	8141.69	27814.6	1.77244
GPX1	20.3231	69.0435	1.76439
LOC100289361	2.92201	9.92059	1.76347
ST14	1.71846	5.83086	1.7626
SENP7	2.43397	8.24841	1.76081
RANGRF	7.47593	25.3314	1.7606
RPL36	57.5629	194.976	1.76008
GNB2	5.83213	19.7199	1.75756
IFT27	7.21582	24.3922	1.75719
B3GAT3	1.00305	3.38237	1.75364
LINC01031	5.69883	19.1616	1.74948
PSMG3	10.062	33.7854	1.74748
GPX4	73.9016	247.192	1.74196
RPS15	36.4495	121.648	1.73875
PMM1	4.01699	13.4046	1.73854
GAMT	5.06346	16.8931	1.73823
SNHG10	128.831	429.679	1.73777
CCDC71	3.98957	13.3023	1.73738
ARHGEF19	2.67606	8.91829	1.73666
ATAD3A	0.786598	2.6177	1.7346
SCARNA7	501.706	1669.42	1.73443
RPLP2	138.235	459.94	1.73432
VPS25	35.056	116.536	1.73304
FBXW5	1.04591	3.47347	1.73162
ATP5G1	118.048	391.838	1.73088
ZNF500	1.48137	4.90967	1.72869
S100A6	624.055	2067.64	1.72824
NUDT3,RPS10,RPS10-NUDT3	1768.39	5854.26	1.72705
HIST1H4D	511.929	1693.39	1.72589
EPB41L4A-AS1,SNORA13	17.5985	58.131	1.72386
PPP4C	34.7287	114.626	1.72274
DPM2	8.36603	27.6072	1.72243
FAM83F	2.64509	8.71762	1.72062
COA3	26.4677	87.0774	1.71807
TUBGCP6	0.81051	2.66528	1.71739
PLK3	3.33166	10.9447	1.71592
LSR	2.21421	7.2681	1.71478
NUDT2	45.3014	148.576	1.71357
GRHPR	23.397	76.6727	1.71239
TFAP4	1.25013	4.09663	1.71236
ATF5	3.79506	12.4318	1.71184
CDKN2A	5.05523	16.5288	1.70914
AIP	2.29042	7.47419	1.70631
BOP1	4.25172	13.8529	1.70407
WDR83OS	44.3732	144.282	1.70113
PDGFB	1.70012	5.51293	1.69719
ARL6IP4	6.87457	22.286	1.6968
MRPS2	6.2912	20.3799	1.69574
ZNF561-AS1	7.70701	24.9547	1.69507
HIST1H4H	508.599	1645.78	1.69417
VAMP8	33.5527	108.29	1.6904
BTD	4.52932	14.5956	1.68817
UROD	11.1483	35.8904	1.68677
HYAL2	3.9329	12.6577	1.68635
FAU	82.1599	264.292	1.68563
ARL16	5.94968	19.1075	1.68325
HIST1H2AH	25.1317	80.6843	1.68278
COMMD4	10.9608	35.1317	1.68042
NUDT18	1.23683	3.95953	1.67868
TMED9	30.2253	96.5254	1.67515
MMP24-AS1	3.54201	11.3068	1.67455
MRPL14	47.6057	151.886	1.67379
DMAP1	2.28561	7.29061	1.67346
PRMT1	66.288	210.967	1.6702
MAN2B1	2.47047	7.84806	1.66755
PSENEN	43.6478	138.49	1.6658
CSK	3.41299	10.8253	1.6653
RPL18A	260.485	825.825	1.66463
MEA1	15.8956	50.3498	1.66336
NDUFV1	4.64655	14.6575	1.6574
BAD	1.14482	3.60975	1.65678
MTHFS,ST20,ST20-MTHFS	12.179	38.3755	1.65579
SSR4	109.117	343.729	1.65539
RBM42	1.62676	5.12445	1.65539
RPS6KB2	4.21921	13.2829	1.65453
CITED1	1.13108	3.55891	1.65374
C12orf10	12.2782	38.6331	1.65373
MRPL23	2.71675	8.52533	1.64987
PSMB5	263.727	827.29	1.64935
TRPT1	6.82913	21.3704	1.64584
POLR2G	163.242	510.786	1.64571
DHRS1	3.8706	12.1036	1.6448
RHOC	31.7312	99.152	1.64374
MPV17L2	2.5119	7.83328	1.64084
C11orf52,HSPB2	2.10794	6.56373	1.63868
CDK10	1.25096	3.8944	1.63836
TIMP1	48.6696	151.366	1.63695
PRDX2	87.9772	272.588	1.63152
FAAH	1.20933	3.74386	1.63032
RDH13	1.02904	3.18354	1.62934
NADSYN1	3.1217	9.65537	1.629
NOP16	18.7254	57.6735	1.62291
BCS1L	10.6488	32.7578	1.62116
LINC00326	2.55341	7.8291	1.61642
FLAD1	16.4757	50.5084	1.61618
CHCHD6	1.90177	5.82984	1.61611
B9D1	3.0741	9.42265	1.61597
DUSP2	2.11718	6.47844	1.6135
TMEM219	17.2167	52.6511	1.61266
JMJD4	2.2454	6.86189	1.61163
UCKL1	3.58362	10.9509	1.61156
MRPS34	6.04784	18.4715	1.61081
SEC14L2	6.26922	19.1355	1.60989
TARBP2	2.20155	6.71037	1.60787
ACOT8	3.53142	10.7576	1.60704
TMEM102	1.19541	3.63809	1.60568
DNAJC4	2.40125	7.30552	1.6052
PHLDA3	4.64139	14.1103	1.60412
TOR4A	1.85749	5.64361	1.60326
POP7	18.2523	55.4499	1.60311
LOC100506207	1.56209	4.74406	1.60265
ZNF787	2.25605	6.84763	1.6018
CENPM	2.82236	8.53297	1.59614
TST	3.70781	11.2038	1.59535
NME4	9.98453	30.1571	1.59473
RPL8	335.28	1011.94	1.59368
PLAU	16.0224	48.323	1.59262
LMAN2	6.99061	21.0762	1.59213
ALG1	4.08463	12.3121	1.5918
SLC25A10	1.88382	5.67679	1.59141
EFNA1	1.77562	5.33834	1.58807
STK11	2.07637	6.24198	1.58794
RAB17	1.8894	5.67817	1.58749
LYSMD1	2.71836	8.16828	1.5873
TRAF4	12.3615	37.0905	1.5852
PNKP	1.98599	5.94832	1.58262
PSMD9	18.3711	54.8918	1.57916
ANAPC11	2.96577	8.8535	1.57784
TXNDC17	9.40245	28.0676	1.5778
FAM129B	4.57128	13.6336	1.5765
CBY1	4.7715	14.2119	1.57458
ABCC10	1.41652	4.21865	1.57443
C11orf24	7.75194	23.0626	1.57293
ATP6V0B	35.9085	106.717	1.5714
CRADD	4.28257	12.7248	1.57109
POLR1C	78.146	231.945	1.56954
STRA13	7.9193	23.501	1.56928
SLC25A11	15.9419	47.2945	1.56885
EIF3K	138.015	408.983	1.56722
CCDC12	2.03393	6.02516	1.56673
PAXIP1-AS1	2.35534	6.97698	1.56667
HPS1	3.4037	10.0782	1.56605
EXOSC5	2.70486	7.99866	1.5642
ADI1	54.5202	161.181	1.56382
GPKOW	3.3192	9.80988	1.5634
MRPL11	25.0481	74.0241	1.5633
PSME2	104.312	308.195	1.56293
ZNF768	6.1121	18.0495	1.56222
SPINT2	81.3712	240.041	1.56069
TRIM16L	4.37865	12.9131	1.56028
LPP-AS2	0.957074	2.82202	1.56003
TPM2	11.2543	33.1533	1.55868
SERINC2	1.40421	4.12009	1.55291
NDUFA2	37.0909	108.795	1.55247
CPSF4	8.55048	25.0525	1.55088
KEAP1	5.30531	15.5438	1.55083
IQCD	1.09754	3.21401	1.5501
HILPDA	21.9411	64.1624	1.54809
BRF2	7.65141	22.3706	1.5478
EPN1	1.37836	4.02955	1.54767
BCAT2	3.29002	9.61426	1.54708
PRELID1	125.356	365.263	1.5429
SLC37A1	1.28069	3.72759	1.54132
SQSTM1	29.7905	86.5419	1.53854
SNRNP25	14.4349	41.8519	1.53574
NTMT1	5.67148	16.4399	1.53541
UQCC2	14.3836	41.6937	1.5354
LOC100507547	1.15648	3.35166	1.53513
HIST2H2BF	245.333	710.352	1.53379
TNIP2	2.91862	8.44786	1.5333
MRPL55	1.53106	4.43115	1.53315
C6orf48	184.273	532.933	1.53211
ABHD14A,ACY1	6.74427	19.4993	1.53169
PDCD2L	26.1382	75.5084	1.53048
EXOSC1	15.0505	43.4766	1.53043
EHD1	1.79627	5.18408	1.52908
GUSBP1	2.46379	7.09737	1.5264
NDUFA11	10.2624	29.5116	1.52392
PUF60	22.1604	63.6915	1.52312
EID2B	2.51376	7.22477	1.5231
HIST1H3A	29.6332	85.1046	1.52202
IFITM3	63.7958	183.129	1.52132
GUSBP4	1.59522	4.57806	1.52098
LOC100506860	1.23654	3.54433	1.51921
MAD2L1BP	24.4219	69.9082	1.51729
CD163L1	1.57588	4.51041	1.5171
PLSCR3,TMEM256	33.4833	95.8213	1.51691
BTBD6	5.92989	16.9535	1.5155
RNF113A	2.28531	6.52448	1.51347
TMEM222	2.54993	7.27465	1.51242
DYNLT1	234.459	668.663	1.51195
HSF2BP	1.07356	3.05885	1.51058
RNF25	8.26256	23.535	1.51015
PLEC	0.960355	2.73523	1.51002
GAL	21.5548	61.3684	1.50949
RNASEH2A	32.8729	93.5271	1.50848
EMG1	206.646	587.744	1.50803
TOMM7	34.1495	97.1198	1.5079
WDR45	3.84312	10.928	1.50768
TMEM140	1.01184	2.87567	1.50691
PRADC1	4.43289	12.5896	1.50592
SLC25A6	8.52808	24.2191	1.50585
UQCC3	4.04607	11.4504	1.50081
BABAM1	16.5922	46.9441	1.50044
LOC101928710	2.49131	7.04669	1.50004
PWP2	1.38445	3.91459	1.49955
TSTA3	25.1812	71.1439	1.49839
UPP1	5.40509	15.2608	1.49744
B4GALT2	9.81737	27.6983	1.49639
SCARNA6	1979.99	5572.34	1.49279
TMEM99	21.4733	60.4227	1.49254
TPI1	756.14	2126.54	1.49179
TSEN34	15.3921	43.2805	1.49153
GNA11	1.89903	5.33393	1.48994
DNAJC17	2.96527	8.32252	1.48886
GALT	3.17895	8.91894	1.48832
PSMB6	100.175	280.847	1.48727
FUNDC2	18.5348	51.9445	1.48673
PIH1D1	16.4413	46.0693	1.48648
CA11	2.2895	6.41513	1.48645
AP1M2	11.8777	33.251	1.48515
ATOX1	27.0148	75.611	1.48485
PTGES2	7.37083	20.6293	1.4848
MRPS26	26.8704	75.1835	1.4844
GALE	8.77549	24.5532	1.48436
DUS1L	3.96752	11.0983	1.48403
CORO1B	1.07587	3.00876	1.48367
RPLP1	465.34	1301.34	1.48364
CECR5	9.72402	27.1865	1.48327
AIFM2	3.21965	8.99632	1.48243
PAFAH1B3	7.57418	21.1542	1.48178
ALYREF	22.3137	62.2717	1.48065
C16orf91	13.7087	38.2029	1.47859
N6AMT2	12.4615	34.7173	1.47818
C21orf33	5.5439	15.4405	1.47775
APOBEC3H	2.28946	6.3703	1.47635
EMC9	7.34604	20.4385	1.47625
RPS28	26.0066	72.3311	1.47574
ENDOG	2.54567	7.07966	1.47564
PGLS	4.81867	13.3825	1.47364
RANGAP1	6.71486	18.6237	1.47171
HIST1H2AG	38.0843	105.565	1.47086
BCAS4	5.5138	15.274	1.46996
HIST1H2BK	79.6307	220.392	1.46868
HCFC1R1	1.99752	5.52831	1.46863
CSAG3	1.39065	3.84676	1.46788
EIF3J-AS1	1.15815	3.20271	1.46748
OSR2	1.9717	5.44843	1.4664
CTDSP1	3.04713	8.41924	1.46624
COX6A1	187.786	518.396	1.46497
ILVBL	2.04056	5.62659	1.46329
KLHDC4	4.3104	11.8748	1.46201
ARFIP2	14.7984	40.7068	1.45983
EXOSC7	37.0847	101.9	1.45826
MYBBP1A	2.58858	7.09996	1.45565
CXorf40B	12.3815	33.9294	1.45435
NDUFS3	87.2198	238.742	1.45272
RPS3	1245.9	3403.11	1.44966
ATG101	10.1187	27.6315	1.4493
MNX1-AS1	4.94658	13.4918	1.44758
TUBB4B	58.859	160.458	1.44686
DEDD2	2.46412	6.7057	1.44432
UQCRQ	48.5788	132.168	1.44397
DRAP1	2.49546	6.78837	1.44376
UBA6-AS1	4.8598	13.2172	1.44344
SART1	1.22011	3.31816	1.44337
NSMCE1	53.3921	145.117	1.44252
SYNE4	4.03471	10.9485	1.4402
PRMT7	3.27009	8.87203	1.43994
WBSCR16	7.19791	19.4931	1.43731
ATP6V1F	37.9508	102.677	1.43591
PIGBOS1	5.27767	14.2784	1.43586
TRMT112	55.6924	150.618	1.43534
LEKR1	1.52907	4.13513	1.43528
TK1	11.1408	30.126	1.43516
ZFAND2A	13.591	36.7077	1.43343
SNX17	84.3682	227.83	1.43319
TRAPPC2L	37.1053	100.128	1.43215
JTB	68.8924	185.536	1.42928
TMEM205	15.8282	42.6232	1.42914
ARF5	43.2996	116.579	1.42888
SYBU	5.52995	14.8792	1.42796
SH3GL1	1.01402	2.72597	1.42668
ADPRHL2	7.10984	19.0969	1.42545
SMDT1	11.2022	30.0817	1.42511
FBXO2	7.52027	20.1889	1.42471
BLOC1S1,RDH5	17.9166	48.0388	1.4229
NDUFB11	50.2824	134.808	1.42279
RRP12	7.12241	19.0884	1.42225
MGST3	54.4836	146.005	1.42212
TMEM186	10.7153	28.7137	1.42207
TRUB2	17.0451	45.6337	1.42074
LINC00116	1.47182	3.93855	1.42006
MRPL54	10.586	28.3186	1.41959
FAM98C	1.02238	2.73445	1.41932
CNPPD1	11.1756	29.881	1.41887
MYBL2	8.34817	22.2874	1.4167
RABEPK	33.4692	89.3081	1.41596
COA4	57.1205	152.27	1.41456
ECSIT,ZNF653	3.16942	8.44852	1.41448
ARAP1	0.943981	2.51432	1.41334
APBB3,SRA1	30.603	81.5023	1.41317
PTDSS2	6.66794	17.7368	1.41143
RIC8A	8.43737	22.3915	1.40809
PRKAR1B	1.22444	3.24744	1.40718
FTL	476.401	1263.4	1.40706
WRAP73	9.59409	25.443	1.40705
WDR25	2.1631	5.73504	1.40671
MRPS21	32.7158	86.7265	1.40649
STK19	1.61819	4.28281	1.40417
KLK6	1.35456	3.58449	1.40394
C20orf24,TGIF2,TGIF2-C20orf24	150.112	396.925	1.40283
STK32C	1.16645	3.08104	1.40129
CORO6	1.45383	3.83874	1.40077
TSPAN1	9.003	23.7666	1.40046
PPAP2C	8.99842	23.7544	1.40045
SNORD3A	70918.3	187008	1.39887
LMF1	0.958048	2.5245	1.39783
SYNGR2	6.74643	17.7723	1.39744
SGSM3	1.72394	4.53899	1.39666
UBL5	773.873	2036.28	1.39577
SMPDL3B	2.87879	7.5735	1.3955
NRP1	1.02239	2.68866	1.39495
PIEZO1	2.70804	7.11752	1.39413
RPS21	557.165	1464.23	1.39396
RUVBL2	17.8093	46.7749	1.3931
SAT2	27.0408	71.0158	1.393
SRM	21.7055	56.9982	1.39286
PACS2	1.19102	3.12481	1.39157
USE1	4.37127	11.4631	1.39087
PRKD2	3.54174	9.28135	1.38988
PYCR1	13.992	36.6609	1.38964
SERPINH1	10.3281	27.0543	1.38928
FKBP8	1.2716	3.33022	1.38897
STOML2	149.624	391.764	1.38864
SNHG7,SNORA17,SNORA43	11.8581	31.0314	1.38786
COASY	9.43804	24.6966	1.38776
MRPL38	5.72348	14.9756	1.38765
B3GNTL1	2.65808	6.94954	1.38653
SPR	23.7693	62.1433	1.3865
RBPMS2	2.87565	7.51351	1.3856
TBCB	12.9848	33.9221	1.38541
RPS16	934.615	2440.82	1.38492
BSG	19.071	49.7413	1.38307
PELI3	1.23559	3.22206	1.38278
IQCH	1.03358	2.69481	1.38254
CPNE7	5.8502	15.2489	1.38215
DNPEP	5.09973	13.2906	1.38192
TRAPPC3	69.4568	180.957	1.38146
TMEM141	9.06095	23.6061	1.38142
PFDN5	497.092	1294.96	1.38133
PEF1	21.9417	57.1273	1.38051
SERPINB8	4.03771	10.5114	1.38035
PSMB3	347.425	903.252	1.37843
HSPBP1	1.12562	2.92611	1.37826
MRPL21	89.8698	233.483	1.37741
ALKBH2	12.6859	32.9137	1.37547
PAN3-AS1	2.35022	6.09649	1.37518
DGKZ	2.89707	7.50608	1.37347
U2AF2	7.11069	18.4225	1.37341
DHRS3	2.19232	5.67781	1.37288
IMPDH1	9.15117	23.6946	1.37253
CD81	41.8823	108.348	1.37126
NDUFB9	182.544	471.619	1.36937
CKS1B	206.576	533.345	1.36839
MPDU1	52.4097	135.305	1.36831
CDK5	18.1878	46.9535	1.36826
ITM2C	21.5544	55.6091	1.36734
CLN3	2.45177	6.32004	1.36611
GET4	3.96967	10.2265	1.36522
SARS2	1.56654	4.03215	1.36397
TNNT1	8.98067	23.1084	1.36352
CCDC51	13.5834	34.935	1.36283
USMG5	1278.94	3287.37	1.36198
SURF1	53.093	136.448	1.36176
DMKN	48.5007	124.565	1.36082
RPL28	75.1902	193.056	1.3604
TMEM231	4.04055	10.3666	1.35932
HMBS	44.2473	113.466	1.3586
TADA3	17.4852	44.8019	1.35742
EBPL	58.9058	150.883	1.35694
TPRA1	5.26564	13.4784	1.35597
SDF2L1	2.98059	7.62914	1.35592
CYB5A	14.118	36.0891	1.35403
RING1	8.70974	22.257	1.35356
RAB1B	20.7741	53.0746	1.35324
DCAF15	3.54128	9.03889	1.35187
RPS14	1491.49	3806.73	1.3518
RRP8	4.80186	12.2522	1.35137
FPGS	2.32222	5.92157	1.35047
CSRNP1	1.84204	4.6961	1.35016
PLCD1	1.00413	2.55972	1.35004
P4HTM	4.68165	11.9317	1.34972
GSTO1	297.255	757.417	1.34939
TGFB1	3.21357	8.18754	1.34925
B9D2	3.11214	7.92574	1.34864
CDK4	140.122	356.818	1.34851
SLC25A20	16.7958	42.7669	1.34839
BANF1	102.094	259.655	1.3467
HLA-A	61.4355	156.045	1.34482
PPP6R2	2.2716	5.76704	1.34412
PCBP4	3.99559	10.1347	1.34282
APMAP	40.2138	102	1.3428
PLCD3	3.00111	7.60827	1.34207
ZNRD1	49.7775	126.164	1.34174
HIST1H2AJ	9.36172	23.6939	1.33967
VPS9D1-AS1	1.55234	3.92862	1.33958
AACS	2.74057	6.93311	1.33903
PLOD3	2.5413	6.41434	1.33574
VAMP2	6.2834	15.851	1.33496
SPRYD4	16.8313	42.4403	1.33429
ELOF1	11.2978	28.4598	1.33289
ISYNA1	5.98694	15.0809	1.33283
GALNT14	2.2095	5.55815	1.33088
NFKBIE	2.43947	6.13636	1.33081
DPH7	4.98085	12.5275	1.33064
C17orf62	5.80789	14.5919	1.32908
HIST1H2AB	71.6016	179.793	1.32827
ID3	12.1378	30.465	1.32765
MYL6B	8.42088	21.1231	1.32678
TUBB3	4.88206	12.2434	1.32644
SNRPD2	273.849	686.631	1.32616
PARK7	178.348	446.865	1.32514
ZNF248	3.21213	8.04818	1.32513
PNP	55.5883	139.192	1.32422
STXBP2	12.3939	31.0252	1.32381
UBA52	185.15	463.456	1.32374
IFT20	12.3171	30.8106	1.32276
SOX12	2.20069	5.49816	1.321
SNHG11,SNORA60,SNORA71E	5.01446	12.5267	1.32084
RNF181	69.9947	174.761	1.32007
AP1G2	3.96846	9.90255	1.31922
DCTPP1	95.6724	238.729	1.3192
GRIK2	1.11675	2.78566	1.31872
C14orf2	275.846	687.787	1.3181
IMP3	146.805	366.007	1.31797
PSMB4	361.119	899.452	1.31657
MRPL40	61.0302	151.895	1.31548
NDUFB8	138.075	343.635	1.31543
KATNB1	1.03879	2.58241	1.31382
BDH1	1.70317	4.23102	1.31279
GSTO2	130.785	324.866	1.31265
SH2D2A	2.58051	6.40616	1.31181
BRI3	33.2126	82.4109	1.3111
OSCP1	7.61956	18.9023	1.31078
SELK	70.4535	174.709	1.31021
AKR1A1	84.4708	209.362	1.30947
BOLA1	3.30022	8.17778	1.30915
AKIP1	28.2084	69.8816	1.30879
FAM127A	3.69126	9.1434	1.30862
PES1	26.7269	66.1937	1.3084
RNASEH1-AS1	2.21419	5.48277	1.30812
POLD2	19.1326	47.3618	1.30769
SPRYD3	8.3445	20.6501	1.30725
EEF1A2	21.3029	52.7103	1.30704
FAM64A	11.0409	27.2894	1.30548
SH2D5	1.26455	3.12516	1.3053
ZNF580	5.64315	13.9342	1.30406
AP2S1	105.082	259.389	1.30361
SCAMP1-AS1	2.50284	6.17499	1.30287
C9orf69	2.7213	6.71233	1.30252
TUSC2	9.19041	22.6625	1.30211
RNA45S5	1.08851	2.68346	1.30173
TROAP	3.78363	9.32692	1.30163
C16orf58	2.77142	6.82579	1.30037
UQCRC1	84.5284	208.149	1.30011
HS1BP3	1.5887	3.90631	1.29796
SDC1	4.28619	10.5381	1.29785
AP1S1	37.4351	92.0168	1.29751
BCAP31	120.575	296.368	1.29745
FBXW4	8.90404	21.8768	1.29687
AVEN	6.50599	15.9842	1.29681
POLR2I	6.99439	17.1636	1.29509
SLC52A2	1.4092	3.45785	1.295
HIST1H4E	556.175	1363.57	1.29378
ELP5	22.8377	55.9478	1.29266
WDR46	16.6024	40.6035	1.29021
CHPF	4.51855	11.0477	1.28982
SSSCA1	2.70904	6.62106	1.28928
RPL18	465.115	1136.67	1.28916
CLDN7	22.4811	54.9386	1.28911
ARPC4,ARPC4-TTLL3,TTLL3	155.589	380.216	1.28907
FHOD1	1.58747	3.8788	1.28888
RPL10	315.878	771.794	1.28885
LAMTOR5	230.749	563.62	1.2884
RNF7	42.2093	103.075	1.28806
PRAF2	2.41047	5.88499	1.28772
LINC00152	16.6647	40.6845	1.28769
TMEM11	5.08098	12.4034	1.28755
PKIG	5.84072	14.2525	1.28699
MMP14	1.46844	3.58089	1.28604
EBP	57.0867	139.144	1.28535
TMEM9	14.7094	35.8428	1.28495
KCNJ14	1.11499	2.71385	1.28331
NPRL3	2.48319	6.03872	1.28205
LOC100506844	10.7933	26.2263	1.28088
SNHG8,SNORA24	179.469	435.75	1.27977
AKT1S1	7.70172	18.692	1.27917
RPSA	2719.1	6598.04	1.27891
HIST1H2BO	257.718	624.517	1.27695
USP2-AS1	2.2785	5.5175	1.27593
HMG20B	4.46594	10.8128	1.2757
DEF8	22.2187	53.787	1.27548
MFAP2	6.75234	16.3446	1.27535
L3MBTL2	6.83247	16.5373	1.27524
AARSD1,PTGES3L,PTGES3L-AARSD1	24.0663	58.2494	1.27523
TM7SF2,VPS51	6.54785	15.8455	1.27498
LINC01588,LINC01599	2.65555	6.42189	1.27399
RPS2	1496.96	3619.86	1.27389
SCNM1,TNFAIP8L2,TNFAIP8L2-SCNM1	8.75894	21.1739	1.27345
RRP7BP	1.23058	2.9747	1.27341
HIST3H2BB	29.309	70.8471	1.27337
MRTO4	35.2496	85.1973	1.2732
FAM50A	9.1032	21.9978	1.27291
CLIC1	376.345	908.857	1.272
TTR	105.762	255.336	1.27158
TIMMDC1	37.3777	90.1684	1.27044
IFI6	13.7913	33.2611	1.27008
NENF	62.9898	151.781	1.2688
SNF8	35.4976	85.5342	1.26878
TOMM22	109.763	264.376	1.2682
SH3BGRL3	20.0451	48.2776	1.2681
IRAK1	8.66861	20.8718	1.26768
GPNMB	1.89042	4.55146	1.26763
MRPS24,URGCP,URGCP-MRPS24	132.786	319.691	1.26758
GIT1	3.3611	8.09072	1.26734
URM1	4.16781	10.0235	1.26603
PAQR4	2.12814	5.11732	1.2658
PYGB	6.78391	16.3107	1.26563
SLC4A2	2.30668	5.54462	1.26527
WDR73	10.3817	24.9467	1.26481
MSRB1	6.71167	16.1166	1.2638
HIST1H2BM	48.8603	117.315	1.26365
COQ9	18.772	45.0664	1.26347
PTS	34.8153	83.5606	1.2631
PSMB7	416.735	999.979	1.26277
SNORA53	21856	52413.3	1.26191
MGC72080	4.42789	10.6141	1.26129
UQCR11	12.9609	31.0578	1.26079
PELP1	6.1226	14.6653	1.26019
HDDC3	25.5417	61.1631	1.25981
LPCAT4	3.1876	7.63054	1.25932
KXD1	22.5311	53.9158	1.25879
MRPL24	32.3208	77.3138	1.25826
CARS2	22.5657	53.9749	1.25816
KCNN4	3.17425	7.58339	1.25643
TWF2	4.1487	9.90852	1.25601
SAMD1	3.39956	8.11455	1.25516
ICA1	4.03149	9.61291	1.25366
SLC1A2	1.66206	3.96231	1.25337
RAB36	1.44121	3.4348	1.25294
POMT1	1.69021	4.02733	1.25262
TUFM	43.2696	103.099	1.25261
FAM71E1	4.24784	10.1161	1.25185
SDCCAG3	18.065	43.017	1.25171
MYDGF	18.1469	43.2054	1.25149
NME1,NME1-NME2,NME2	1851.29	4407.01	1.25127
ITPKC	2.31551	5.50623	1.24974
FBXO27	4.09312	9.72622	1.24868
HIST1H3J	219.602	521.643	1.24817
NARR,RAB34	155.433	369.207	1.24813
EML2	3.26231	7.74593	1.24754
FARS2	9.69664	22.992	1.24558
TMA7	153.799	364.565	1.24513
CDKL3	1.58066	3.74606	1.24484
MSRA	5.3976	12.791	1.24474
GSTK1	31.1687	73.8471	1.24444
PSMC3	33.1836	78.6059	1.24417
TMED1	2.63704	6.24321	1.24337
NUCB1	2.87582	6.80836	1.24333
TIMM44	4.78808	11.3324	1.24293
CNTROB	3.73353	8.83615	1.24288
ADAM15	4.91492	11.628	1.24237
UQCR10	34.7395	82.1741	1.2421
HINFP	11.5585	27.326	1.24132
ZFYVE19	3.99474	9.4435	1.24122
NUDT1	5.09134	12.0354	1.24116
AKT2	1.77108	4.18631	1.24104
C9orf114	1.48716	3.51247	1.23992
ZBED2	36.1975	85.3863	1.23811
DRG2	12.1651	28.6931	1.23796
CDC42EP2	1.70189	4.01352	1.23773
MGST2	30.4073	71.6876	1.23731
PPP1R1B	3.56654	8.40178	1.23617
MRPL20	40.5718	95.5625	1.23597
RPLP0	1915.81	4509.07	1.23487
PTOV1	10.2084	24.0164	1.23427
LRRC14	1.62256	3.81724	1.23426
GDF15	19.6834	46.3028	1.23412
MAPK11	1.26554	2.97693	1.23408
MRPL27	77.0046	181.134	1.23404
HOXC9	1.37412	3.23148	1.23368
GBA	7.56989	17.7855	1.23236
ICAM3	1.10096	2.58566	1.23177
PP7080	6.5063	15.2775	1.2315
HIST1H2AC	42.7281	100.315	1.23127
ADORA2B	40.3968	94.7913	1.23052
EIF2B4	24.2809	56.9651	1.23026
FIRRE	51.7103	121.064	1.22725
MRPS23	54.9932	128.653	1.22616
ERCC1	11.3323	26.4847	1.22471
TCF25	14.1598	33.0857	1.22441
C7orf49	15.1853	35.4788	1.22428
TMEM14B	111.971	261.603	1.22426
TMEM115	1.6026	3.74321	1.22386
PHF5A	71.963	168	1.22314
MIR4435-2HG	15.7895	36.8591	1.22305
TRAP1	64.2671	149.965	1.22247
ZNF574	1.38031	3.22015	1.22214
STK36	4.83847	11.2872	1.22206
EDEM2	8.78602	20.4945	1.22195
MUTYH	5.765	13.4444	1.22161
CYTH2	2.78382	6.48424	1.21987
SFTA1P	36.7484	85.5532	1.21914
MRPS17	90.7548	211.201	1.21857
S100A13	179.498	417.46	1.21767
NME5	2.92214	6.79497	1.21744
LOC728673	1.13043	2.62751	1.21683
ZYX	3.02164	7.02029	1.2162
KRTCAP2	88.5747	205.64	1.21515
PHF19	8.26796	19.1916	1.21487
NOSIP	10.1342	23.5158	1.21439
ATP5G3	171.863	398.751	1.21423
PRMT2	14.1574	32.84	1.2139
AKT1	11.7848	27.3352	1.21383
MYL9	9.00808	20.8937	1.21378
PPP2R5B	2.28714	5.30289	1.21323
FAH	10.234	23.6899	1.2109
PSKH1	1.90789	4.41333	1.20989
DAGLB	3.83654	8.87003	1.20913
HGH1	1.85537	4.28868	1.20883
HPCAL1	3.52899	8.14913	1.20739
REEP6	5.52062	12.7479	1.20736
COX7A2	874.803	2019.84	1.20721
MCTP2	3.67372	8.47892	1.20664
CSNK1D	23.6714	54.6236	1.20638
CD99	21.7957	50.2951	1.20638
MRPL22	21.1073	48.6989	1.20615
TSSC1	20.2088	46.558	1.20404
CMTM7	25.6235	59.0282	1.20394
SFXN4	125.065	288.092	1.20385
MVB12A	3.872	8.91322	1.20287
NAGS	1.19571	2.75042	1.20179
GABARAP	504.04	1159.23	1.20155
RPL19	350.233	805.17	1.20098
CD63	160.56	369.08	1.20082
INO80C	12.9075	29.6567	1.20015
SKIV2L	4.4958	10.3269	1.19976
RPS18	802.358	1842.47	1.19933
COX6C	106.195	243.775	1.19884
TMED3	25.1229	57.6481	1.19827
IPO7	84011	192757	1.19814
GSK3A	19.2486	44.1533	1.19776
TMCO4	1.41316	3.24108	1.19755
SNAP25	1.8647	4.27576	1.19724
FHL2	50.6831	116.141	1.1963
MCM5	17.0649	39.0806	1.19542
FAM127B	24.8977	57.0083	1.19516
TMEM147	41.0916	94.0866	1.19514
TMEM9B-AS1	11.6674	26.7068	1.19472
OSGEP	10.4529	23.9251	1.19462
ITGB4	1.6193	3.70561	1.19434
ST6GALNAC6	3.53665	8.08115	1.19218
GYLTL1B	3.43623	7.84897	1.19168
DHRS11	10.5053	23.9948	1.19161
HIST2H2BE	25.8478	59.0142	1.19102
CLPTM1L	52.2199	119.19	1.19059
RPL23	1135.62	2591.94	1.19055
LAS1L	9.37275	21.3913	1.19048
THOP1	14.6501	33.408	1.18929
HSBP1L1	10.1449	23.1252	1.18871
CCDC134	3.98617	9.08516	1.18851
ZNF394	17.2805	39.3515	1.18727
NDUFAF2	15.0926	34.3512	1.18652
BTG2	43.7561	99.5329	1.18569
MANBAL	26.1153	59.4035	1.18565
ARMCX6	16.3232	37.121	1.18531
ABCF3	11.4458	26.018	1.1847
ARMC7	5.43686	12.3541	1.18415
ADA	12.47	28.3173	1.18322
ACSF3	3.33376	7.5704	1.18322
NR1H3	2.60847	5.91895	1.18214
ITPK1	4.49999	10.2042	1.18117
MAFF	2.62262	5.93951	1.17933
GALNT18	2.07564	4.6993	1.17889
CENPW	27.8336	62.9973	1.17846
NSUN5	10.0764	22.7728	1.17634
CEBPA	3.004	6.78339	1.17512
ACADVL	29.3636	66.2838	1.17463
DPH1,OVCA2	21.8095	49.1967	1.17361
OCIAD2	145.686	328.608	1.17351
BYSL	28.1961	63.5601	1.17262
CSRP1	33.6228	75.769	1.17217
C11orf98,LBHD1	78.6389	177.106	1.1713
LOC100289561,PRKRIP1	3.06076	6.89271	1.17118
RPUSD2	8.30162	18.6845	1.17038
DCTN3	18.8865	42.4774	1.16934
RPL32P3,SNORA7B	5.2798	11.8738	1.16922
PSEN2	4.37813	9.84179	1.16861
HIST1H2AM	44.8943	100.872	1.16792
UBL4A	8.28199	18.603	1.16749
CTSL	26.3426	59.1513	1.16701
ERCC2	5.39171	12.1066	1.16698
HIST1H1C	384.665	863.631	1.16681
ECHS1	53.1056	119.192	1.16635
ISOC2	2.20066	4.93708	1.16572
NRM	6.104	13.6849	1.16476
PKIB	6.59191	14.7765	1.16454
UBXN6	2.56188	5.74251	1.16448
ADGRF1	16.038	35.929	1.16365
HIST1H3B	193.324	432.669	1.16225
S100A4	949.602	2123.44	1.16101
PPIE	89.0742	199.127	1.16061
ATP5L	61.7105	137.896	1.15999
UCK1	2.5795	5.76001	1.15898
ZMYND19	3.33924	7.4555	1.15879
CIB1	38.5861	86.1454	1.15869
TIMM23B	7.88609	17.5912	1.15748
ELP6	13.8715	30.9422	1.15745
DDX28	12.3853	27.6089	1.15651
CLPP	3.84986	8.57811	1.15585
DDX54	1.29864	2.89324	1.15568
NPRL2	18.4693	41.1311	1.1551
MEIS3	1.82615	4.06649	1.15498
RXRB	11.9257	26.547	1.15448
CCDC86	13.7532	30.6111	1.15429
CFDP1	2.09144	4.65432	1.15407
POP5	39.6529	88.2212	1.1537
LOC100287015	1.12372	2.49913	1.15314
TRIP6	3.29737	7.33295	1.15308
MRPL52	25.4676	56.6033	1.15222
TYSND1	3.9202	8.70872	1.15153
YRDC	49.0767	108.966	1.15077
TNFRSF10A	15.5617	34.5455	1.1505
TACO1	31.6716	70.2676	1.14967
ALKBH6	5.15229	11.431	1.14967
ING4	6.71995	14.9031	1.14909
FAM228B	5.57362	12.3518	1.14803
RAB35	12.471	27.6164	1.14695
MRGBP	10.8767	24.0746	1.14627
AS3MT,C10orf32	11.2315	24.8447	1.14538
INTS5	6.41953	14.1927	1.14461
DNAJB2	1.81239	4.00679	1.14456
FRMD8	2.2514	4.97586	1.14412
ORMDL3	5.58077	12.3306	1.1437
AKR1B1	126.076	278.397	1.14285
DHRS7B	8.80162	19.4327	1.14264
DDIT4	11.4902	25.3627	1.1423
MRPS18A	19.917	43.8959	1.14009
SLC5A10	2.78057	6.12464	1.13924
FIBP	59.9516	131.989	1.13854
DGCR2	3.81442	8.39654	1.13833
OXSM	31.3928	69.1027	1.13831
COPRS	72.5933	159.653	1.13704
NABP2	22.4924	49.4561	1.13671
IFI27L2	18.8777	41.4941	1.13622
IAH1	28.8505	63.4067	1.13604
MRPL17	21.9339	48.2034	1.13597
PCYT2	4.42765	9.7242	1.13504
USP18	12.3342	27.085	1.13483
TF	1.13618	2.49453	1.13457
RBKS	5.47508	12.02	1.13449
STAG3L2	1.78527	3.91799	1.13397
ASPRV1	7.08313	15.5418	1.1337
NHP2	42.5523	93.3398	1.13326
GEMIN7	18.552	40.6736	1.13252
TIMM13	1.17603	2.57659	1.13154
ECH1	19.8149	43.3964	1.13099
ATP6V0D1	20.4281	44.7359	1.13088
AUP1	52.0631	113.915	1.12962
FBL	163.278	357.237	1.12955
ATP6V0C	9.50048	20.7861	1.12955
PPP2R1A	46.402	101.503	1.12926
RPS17	2741.13	5995.37	1.12908
VKORC1	34.038	74.4082	1.12831
TCTA	11.8812	25.9724	1.1283
APOPT1	19.0888	41.7284	1.1283
MIEN1	38.5815	84.3384	1.12828
RPL41	1958.08	4279.33	1.12795
ESRRA	2.83632	6.19849	1.1279
RBM38	2.23745	4.88969	1.12789
ARF1	65.0751	142.207	1.12781
FAM174A	4.19513	9.16565	1.12752
MVP,PAGR1	6.20491	13.5525	1.12707
MAP2K2	7.52786	16.4397	1.12688
ADCK2	5.6048	12.2322	1.12595
NLRX1	1.67468	3.65317	1.12527
FBXO22-AS1	80.284	175.099	1.12499
MRPS18C	16.9167	36.8875	1.12468
TRPV2	3.15409	6.87754	1.12467
ACBD6	17.6224	38.416	1.12429
CENPB	4.42793	9.65148	1.12412
KAT2A	6.89375	15.0144	1.12298
GLOD4	62.1868	135.44	1.12297
MRPL51	152.65	332.378	1.1226
PHKG2	7.3679	16.0396	1.12231
GPS1	11.6816	25.4202	1.12174
MRPS7	66.5752	144.799	1.12099
STK10	2.07756	4.51541	1.11996
SHISA5	9.0784	19.7129	1.11863
UBXN1	6.5083	14.1318	1.11859
TBCC	13.7856	29.9262	1.11824
MINOS1,MINOS1-NBL1,NBL1	22.1315	48.0239	1.11765
SLC50A1	43.9972	95.4224	1.11692
GTF2H2	3.2382	7.02293	1.11688
NANS	40.3472	87.3946	1.11507
RNU1-3	11.6013	25.1267	1.11493
SLIRP	249.245	539.644	1.11444
DUSP7	3.09911	6.70641	1.11369
NAT14	3.2474	7.02605	1.11343
TAF11	20.2023	43.7012	1.11315
DUXAP10,LINC01296	14.6618	31.7114	1.11294
PSMG4	8.26054	17.8504	1.11165
POLR2H	108.393	234.118	1.11096
HSD17B1	2.30234	4.9711	1.11047
PCYT1A	15.9533	34.43	1.10981
SNTA1	1.83343	3.95612	1.10954
PRKCZ	7.67058	16.5509	1.1095
RPL23AP82	4.94922	10.6743	1.10887
MRPS11	6.60859	14.2512	1.10867
UXT	166.284	358.424	1.10802
PTMS	89.2015	192.251	1.10785
GSS	33.0126	71.1012	1.10686
SDHAF1	2.74653	5.91479	1.10671
PTK2B	1.44026	3.10075	1.10629
MAZ	28.9227	62.2633	1.10618
PLA2G16	7.67889	16.5252	1.1057
SGTA	2.72926	5.87135	1.10518
ITGA3	5.87655	12.6413	1.1051
CHMP4A,MDP1,NEDD8,NEDD8-MDP1	138.861	298.672	1.10492
ICT1	50.0312	107.556	1.10419
LSM2	87.0674	187.143	1.10393
CLPTM1	6.18812	13.2921	1.103
TOMM40	9.09709	19.5174	1.10129
UFSP1	2.03235	4.35997	1.10117
SNRPC	41.8457	89.7486	1.10081
CNP	6.28537	13.4792	1.10067
SYNGR1	1.83148	3.92688	1.10037
TMEM101	8.41581	18.0368	1.09977
ATP5G2	191.77	411.002	1.09977
DPP3	12.0764	25.87	1.09909
SUMF1	11.919	25.5292	1.09889
CHID1	3.78122	8.09687	1.09851
HIST1H4C	2521.25	5398.29	1.09836
GAPDH	1965.72	4206.72	1.09764
HNRNPH2,RPL36A,RPL36A-HNRNPH2	221.421	473.817	1.09754
RBP1	35.8723	76.6619	1.09564
HIST1H1E,HIST1H2BD	173.375	370.387	1.09514
ACTR1B	5.4151	11.5685	1.09514
RPL35A	2170.34	4636.42	1.09509
ANXA2	559.314	1194.79	1.09502
ARPC5L	78.7513	168.149	1.09436
LINC00705	2.23466	4.77093	1.09422
ADRM1	9.47186	20.2172	1.09386
SMUG1	15.6478	33.3866	1.09331
TAF10	36.5822	78.0195	1.09269
POMGNT1	17.0144	36.2652	1.09183
COMMD1	9.77088	20.819	1.09134
DHRS13	6.57659	14.0103	1.09108
HINT1	812.591	1730.94	1.09095
UCHL1	2.09718	4.46714	1.0909
PVRL2	3.79114	8.07485	1.0908
OAZ1	129.217	275.156	1.09045
SHARPIN	2.23989	4.76959	1.09044
MED8	14.6835	31.261	1.09017
ITGAE	7.55142	16.0711	1.08965
TMOD4,VPS72	38.0068	80.8697	1.08934
PRDX5	86.6472	184.324	1.08902
TXN	578.628	1230.78	1.08886
MISP	2.36489	5.02368	1.08698
PON3	5.44059	11.5564	1.08685
RALGDS	2.00512	4.25838	1.08661
MAPK12	3.61672	7.68017	1.08645
MSRB2	7.59113	16.1134	1.08587
RPS15A	4398.19	9334.46	1.08566
ST6GALNAC5	1.59043	3.37497	1.08546
DHX37	2.68904	5.70467	1.08505
USF2	4.41213	9.35979	1.085
FAM57A	12.7737	27.0965	1.08493
TRAPPC1	89.7089	190.265	1.08469
CDC34	8.8672	18.806	1.08464
HSD3B7	2.27471	4.82216	1.084
PNPLA2	7.82489	16.5547	1.0811
SAPCD2	2.05325	4.34007	1.07981
ADSL	113.532	239.81	1.07879
SPG7	6.61314	13.9684	1.07876
APOC1	38.5373	81.3762	1.07835
SDHAF4	14.2181	30.0128	1.07785
HIST1H2BJ	138.689	292.755	1.07783
LMAN2L	21.5247	45.4173	1.07725
CD3EAP	1.76869	3.72991	1.07646
TOP1MT	3.66701	7.73154	1.07615
RRN3P1	6.53568	13.7675	1.07486
PHB	228.049	480.363	1.07478
SNHG12,SNORA16A,SNORA44,SNORA61	71.8894	151.416	1.07467
NDUFS5	206.036	433.902	1.07448
DNAJC5	5.40268	11.374	1.07399
UBE3B	9.61194	20.2237	1.07314
TMEM203	46.9948	98.8218	1.07233
EEFSEC	1.98715	4.17508	1.0711
RPS27	2007.22	4216.47	1.07084
PIGL	2.74712	5.77062	1.07081
UNKL	1.71191	3.59583	1.07072
SRC	1.83046	3.84285	1.06997
APOA1BP	72.6149	152.444	1.06994
NLE1	8.38673	17.6029	1.06964
TRIM47	2.25286	4.72662	1.06905
CDK9	14.2815	29.9553	1.06866
JUN	3.7052	7.77035	1.06843
THOC6	7.69612	16.1324	1.06776
ZNF16	3.81705	8.00113	1.06774
ADRBK1	6.18107	12.9562	1.06772
UBE2M	80.0866	167.847	1.06751
L3HYPDH	6.82873	14.2968	1.066
SCARNA10	21018.6	43962.8	1.06461
SCARNA1	5321.83	11130.1	1.06447
ZNF692	5.22647	10.9303	1.06443
TSEN54	10.4198	21.7758	1.06339
COA1	73.6855	153.957	1.06308
ACOT7	21.5981	45.1	1.06222
RFC2	23.0169	48.0369	1.06145
MCAM	6.68565	13.9513	1.06126
LGALS3BP	23.9801	50.0263	1.06085
STK16	6.75929	14.0995	1.0607
PRR14	1.80565	3.76297	1.05935
MRPL2	27.5422	57.3624	1.05847
E2F4	14.6915	30.5979	1.05845
RPL13	94.0492	195.627	1.05662
TRAIP	4.60492	9.57725	1.05644
NDUFB1	67.0731	139.471	1.05616
ADK	57.4872	119.517	1.0559
FRK	1.35968	2.8257	1.05533
TMEM106C	118.983	247.267	1.05531
UQCRH	306.486	636.288	1.05386
MOV10	8.89444	18.456	1.05311
MRPL9	30.7665	63.8346	1.05298
PYCR2	5.34935	11.0964	1.05265
EBNA1BP2	26.4602	54.8408	1.05143
NECAP2	17.5608	36.3956	1.05141
C7orf26	7.14329	14.8025	1.05118
OASL	3.58331	7.42233	1.05058
BRPF1	3.21195	6.64483	1.04878
DCPS	10.7736	22.2808	1.0483
GSTZ1	10.122	20.9323	1.04823
C15orf39	1.24358	2.57165	1.04819
FSD1	2.87939	5.95357	1.04799
RPS12	1187.64	2455.17	1.04772
P3H3	2.05918	4.25365	1.04663
DTNBP1	9.93235	20.5052	1.04578
ISPD	2.3116	4.76493	1.04356
APH1A	68.234	140.646	1.0435
ZNF784	1.4554	2.99942	1.04327
PHIP	24.2387	49.9399	1.04288
SLC25A1	17.5313	36.1192	1.04283
TRIM7	15.7624	32.4569	1.04204
UNC45A	10.1093	20.8078	1.04143
IMMP1L	33.5144	68.9765	1.04133
HAS3	2.49571	5.13371	1.04055
CYB5R3	6.10933	12.5548	1.03915
AGAP5	8.14674	16.7325	1.03835
UNC119	5.21412	10.7084	1.03825
SDHC	98.8881	202.933	1.03713
APEX2	8.55757	17.5573	1.0368
WDR4	2.54912	5.228	1.03626
ZDHHC16	17.3113	35.4573	1.03437
GPATCH4	6.51569	13.3425	1.03404
RGS16	3.29395	6.74394	1.03377
SLC35B1	52.1081	106.663	1.03347
LRRC75A-AS1,SNORD49A,SNORD49B	1159.5	2372.2	1.03272
GMPR	12.0602	24.6707	1.03255
COG4	27.9786	57.2281	1.0324
FJX1	3.16775	6.47923	1.03236
SULT1A1	5.68976	11.6373	1.03231
C1orf122	12.0797	24.7031	1.03211
MED10	23.2576	47.5361	1.03132
GRWD1	14.576	29.768	1.03016
NAT9	4.09216	8.35484	1.02975
TTC5	21.7144	44.3253	1.02948
HMGA1	83.5733	170.537	1.02897
UFD1L	54.148	110.448	1.02839
ADAT3,SCAMP4	2.27078	4.62987	1.02778
ATPIF1	63.9088	130.292	1.02766
DDT	28.0942	57.2715	1.02754
PMPCA	42.5152	86.6444	1.02713
DDX41	4.95309	10.0925	1.02689
KLHL22	2.28025	4.64517	1.02654
FAM118B	18.0808	36.8127	1.02574
NUP85	65.3436	133.033	1.02567
ITFG3	2.06179	4.19699	1.02546
AKR7A2	11.9522	24.3223	1.025
ZNF678	2.06502	4.20061	1.02444
C11orf80,RCE1	16.1663	32.8829	1.02435
DTD1	16.3735	33.2886	1.02366
PSAP	116.7	237.238	1.02353
TUBA1C	298.424	606.331	1.02274
RPS27L	183.907	373.627	1.02262
ZPR1	32.4035	65.8097	1.02215
RGS3	3.38633	6.87339	1.0213
CNPY2,PAN2	38.3018	77.678	1.02009
DDB2	29.8059	60.4226	1.01949
TOE1	7.47638	15.1553	1.01941
TXNRD2	2.31068	4.68206	1.01883
EFNA4	4.10791	8.32205	1.01854
SRP14-AS1	11.5663	23.4258	1.01817
CCT7	526.858	1067.04	1.01813
NDUFB3	99.795	202.098	1.01802
MIR141	12.7846	25.8887	1.01792
TMEM14C	195.311	395.493	1.01788
DBNDD2,SYS1	53.5101	108.225	1.01615
SLC3A2	78.8665	159.484	1.01593
CHKB,CPT1B	4.50601	9.11151	1.01584
KRT8	225.384	455.695	1.01569
TOMM40L	5.84287	11.8123	1.01554
VARS	22.9287	46.3539	1.01553
AJUBA	13.21	26.7023	1.01533
RPS20	2212.53	4471.54	1.01508
HKR1	1.53544	3.10298	1.015
TBC1D7	29.4568	59.5272	1.01495
PLAUR	4.17766	8.44111	1.01474
MRPL45P2	15.755	31.8322	1.01468
HSD17B8	10.7611	21.7389	1.01445
IFT43	10.6274	21.4685	1.01443
MAPKAPK3	26.5352	53.5954	1.0142
CAPN1	15.1504	30.5971	1.01404
NXN	7.53996	15.2258	1.01389
RPL31	451.402	911.221	1.01339
BRK1	88.1084	177.819	1.01306
TMC7	2.87309	5.79632	1.01253
GBX2	1.81996	3.67103	1.01228
GATB	21.8889	44.144	1.01201
XYLB	2.44783	4.93602	1.01184
RER1	29.5908	59.6476	1.01131
TSPAN14	11.1892	22.5532	1.01123
PEPD	9.80855	19.7645	1.0108
LACE1	2.41552	4.86709	1.01072
BAK1	11.4063	22.9809	1.0106
RPL7A	1544.68	3111.11	1.01012
CAMK1	10.2205	20.5733	1.00931
TALDO1	59.9155	120.601	1.00924
TIMM8A	24.0329	48.3719	1.00916
ASTN2	4.71738	9.49196	1.00872
SMKR1	4.22093	8.48984	1.00818
HINT2	29.6597	59.6162	1.0072
TSPAN33	8.34991	16.7827	1.00714
RPL37	97.8992	196.752	1.00701
GTF2H4	13.0241	26.1667	1.00655
NGRN	81.3176	163.309	1.00597
TXN2	22.5793	45.3328	1.00555
FLOT2	18.9876	38.102	1.00481
ATP13A1	1.92408	3.8584	1.00383
TTYH2	5.83892	11.7078	1.00369
MGAT4B	18.2789	36.642	1.00332
GGACT	2.31723	4.64463	1.00316
ATP5J2,ATP5J2-PTCD1,PTCD1	288.84	578.926	1.00311
ACTR3B	22.0835	44.2615	1.00308
SLC7A6OS	6.95055	13.921	1.00207
PRPF6	10.8365	21.7028	1.00198
CIAPIN1	76.7269	153.629	1.00165
TP53I3	23.1705	46.3912	1.00156
IL12A	3.28739	6.58022	1.00119
BSPRY	9.03924	18.0839	1.00043
SNHG6,SNORD87	138.655	277.366	1.0003
QPCTL	3.2378	6.47615	1.00012
POLR3K	22.2561	44.5139	1.00006
NCKIPSD	1.76047	3.521	1.00002
